# Supplementary material
Source: publisher figshare collection journal article supplement (https://acs.figshare.com/ndownloader/files/4065460)
Supplement: Supplementary file 1 [file 4065460]

Supporting Information

**Single Pt Nanowire Electrode: Preparation, Electrochemistry and Electrocatalysis**

Yongxin Li,<sup>\*,†,‡</sup> Qingqing Wu,<sup>†</sup> Shoufeng Jiao,<sup>†</sup> Chaodi Xu,<sup>†</sup> and Lun Wang<sup>†</sup>

<sup>†</sup> College of Chemistry and Materials Science, Anhui Normal University, Wuhu 241000, China

<sup>‡</sup> Western Transportation Institute, College of Engineering, Montana State University, Bozeman 59717-4250, United States

\* Corresponding author. Ph, 1-406-994-6719; Fax, 1-406-994-1697

Email: [yongli@mail.ahnu.edu.cn](mailto:yongli@mail.ahnu.edu.cn); [yongxin.li@coe.montana.edu](mailto:yongxin.li@coe.montana.edu)

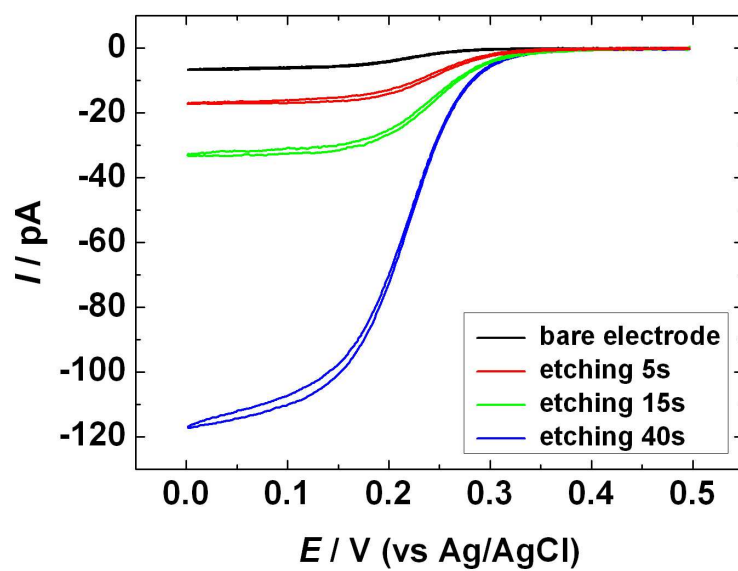

**Figure S1.** CVs of 5mM  $\text{K}_3\text{Fe}(\text{CN})_6$  in 0.2 M KCl aqueous solution at bare Pt electrode and etched Pt nanoelectrodes in different etching time (5s, 15s, 40s).

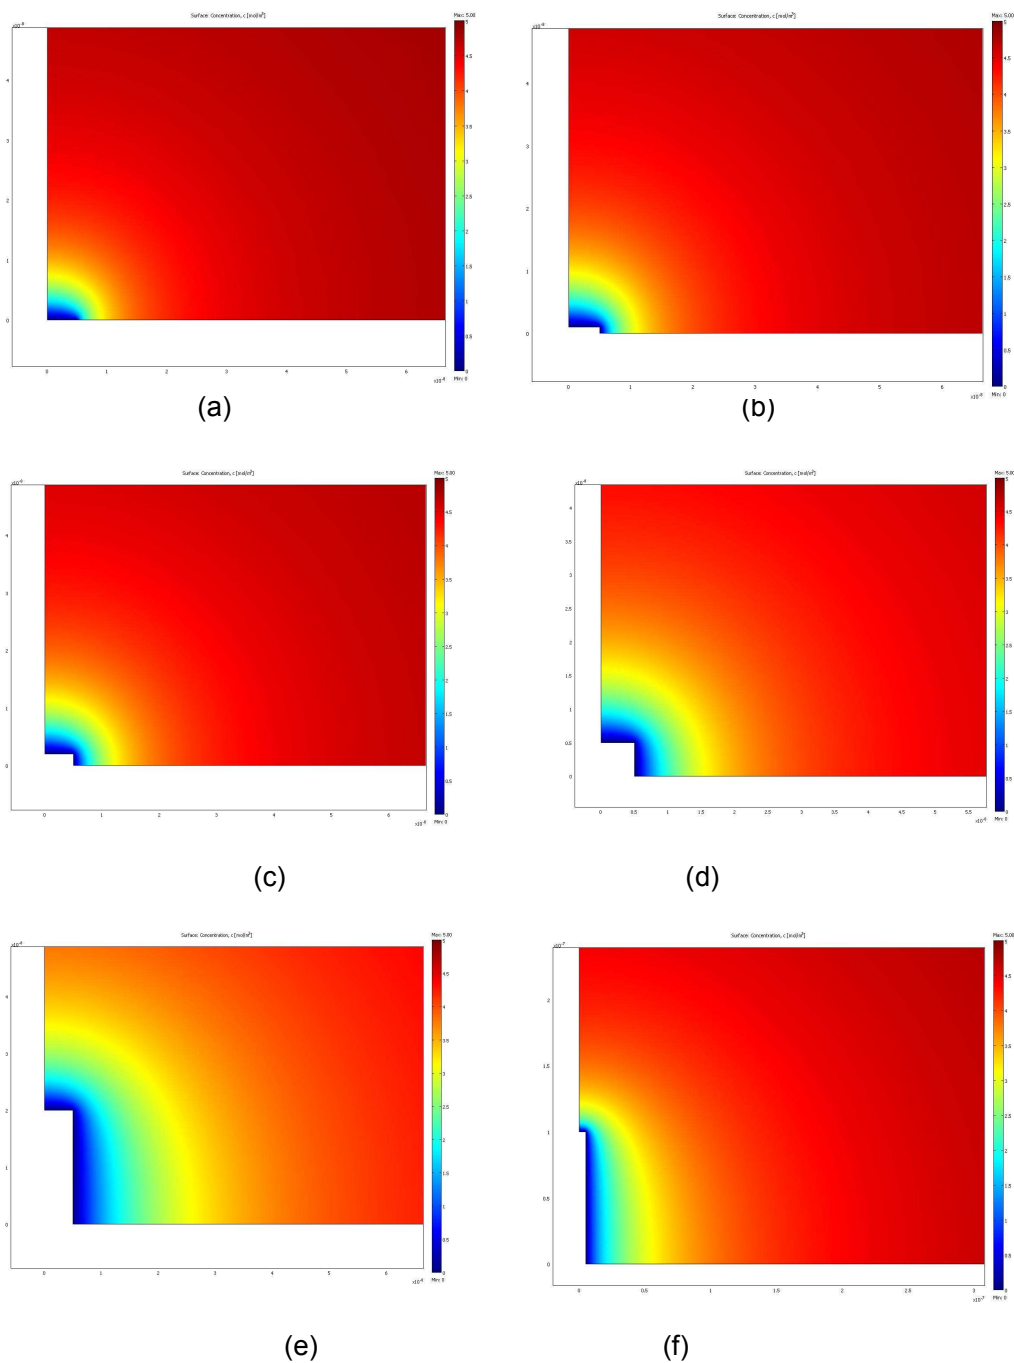

**Figure S2.** The simulation results of 5 mM Fc diffusion on the surface of Pt nanowire electrodes with different wire length (a, 0 nm; b, 1 nm; c, 2 nm; d, 5 nm; e, 20 nm; f, 100 nm)

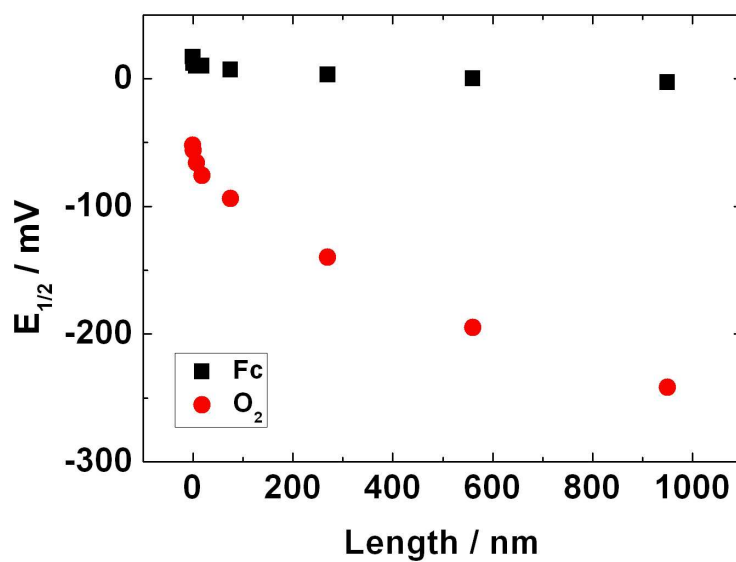

**Figure S3.** The relationship between the  $E_{1/2}$  and the length of Pt nanowire scanning in a 0.5 mM Fc ACN solution (black dots) and an oxygen-saturated aqueous solution containing 0.10 M KOH (red dots). The potential values collected from the CV in 0.5 mM Fc solution are subtracted by 400 mV. Radius of Pt nanowire,  $\sim 4$  nm

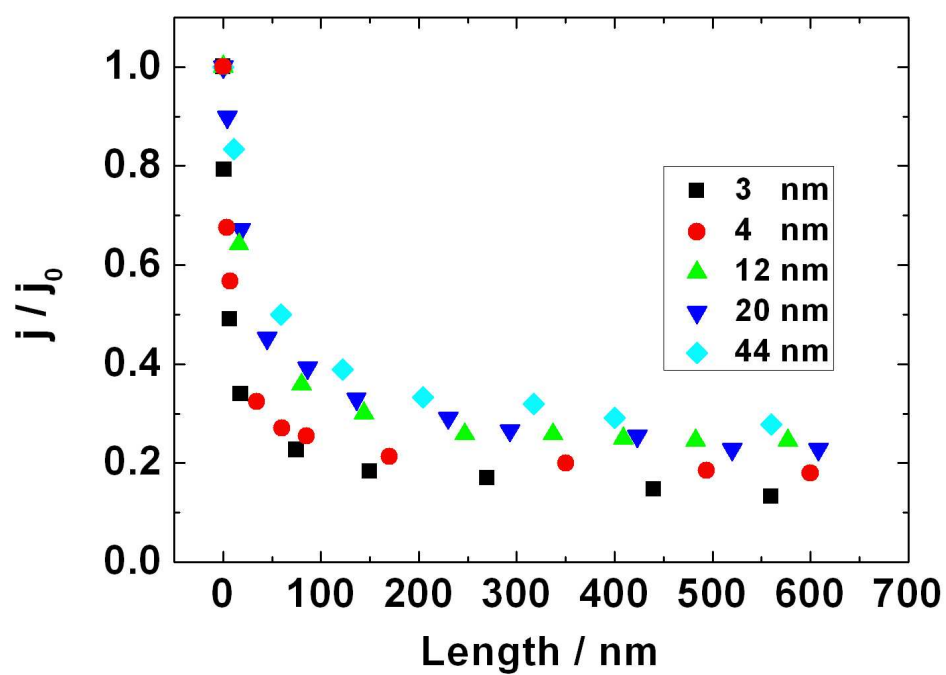

**Figure S4.** The relationship between normalized limiting current density scanning in a 0.5 M Fc ACN solution and the length of Pt nanowire with different radii.

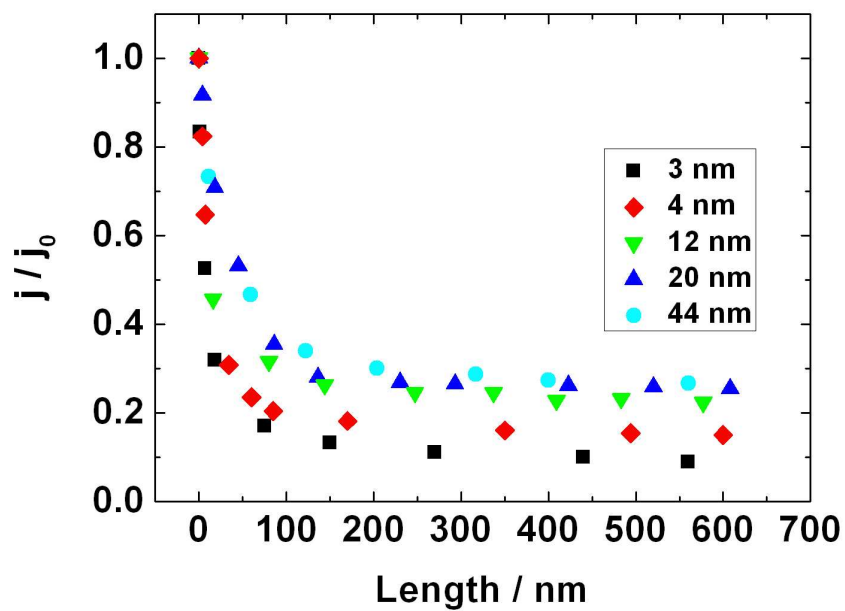

**Figure S5.** The relationship between normalized limiting current density scanning in an oxygen-saturated aqueous solution containing 0.10 M KOH and the length of Pt nanowire with different radii.

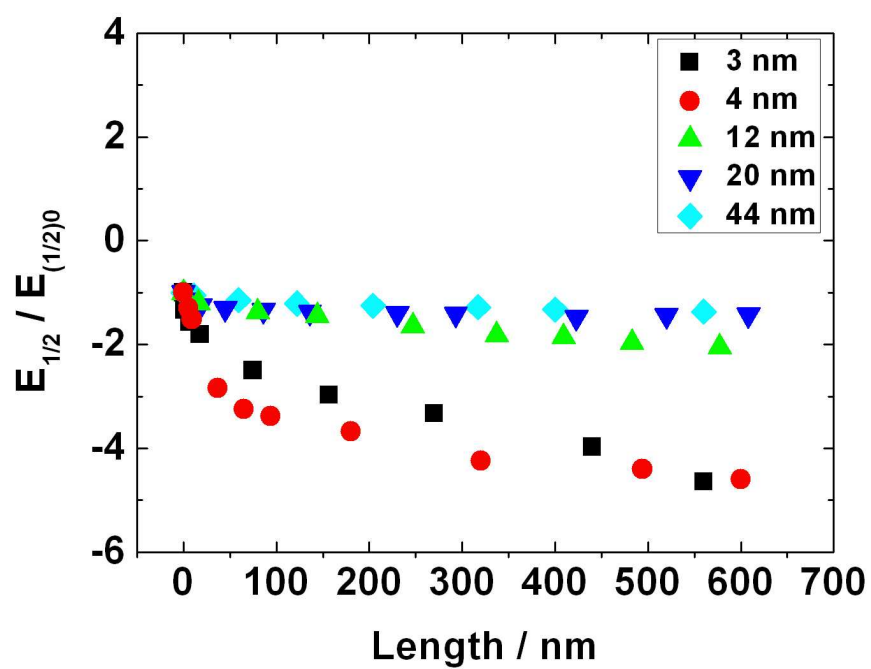

**Figure S6.** The relationship between normalized  $E_{1/2}$  scanning in an oxygen-saturated 0.10 M KOH aqueous solution and the length of Pt nanowire with different radii.
